# Supplementary material
Source: publisher site journal article supplement (https://www.dovepress.com/article/277831)
Supplement: Supplementary file 1 [file get_supplementary_file.php]

**
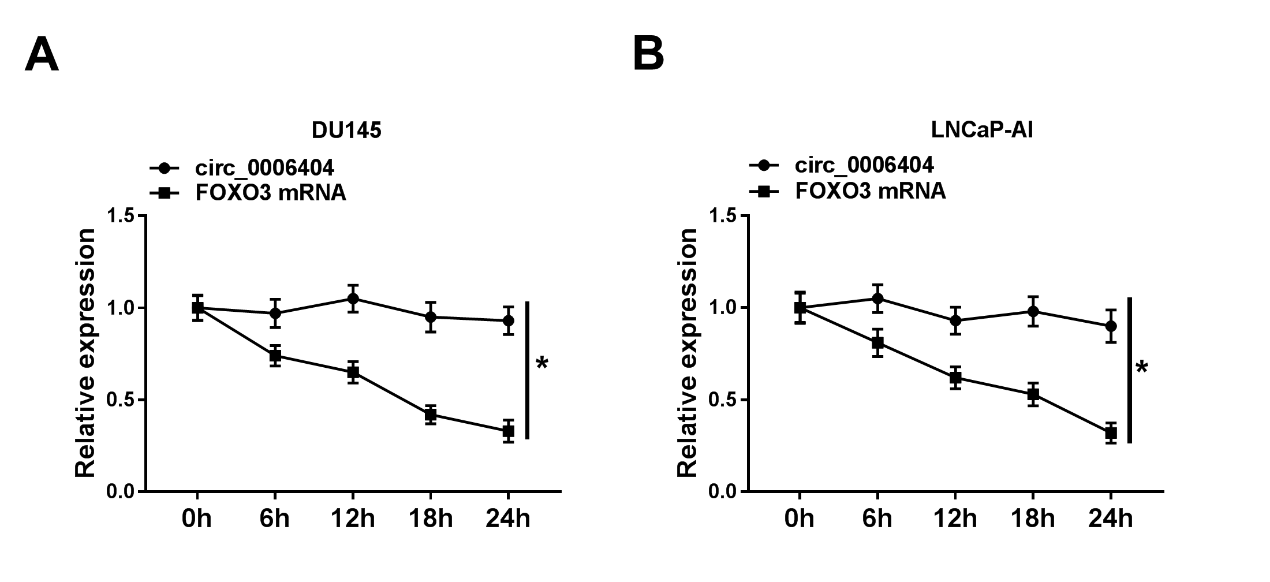
**

**Supplementary Figure 1. Circ_0006404 is a stable circRNA compared with its linear form FOXO3 in PCa cells.** (A and B) PCa cells were exposed to Actinomycin D, and the expression of circ_0006404 and FOXO3 mRNA was examined at the indicated time points by qRT-PCR. **P*<0.05.


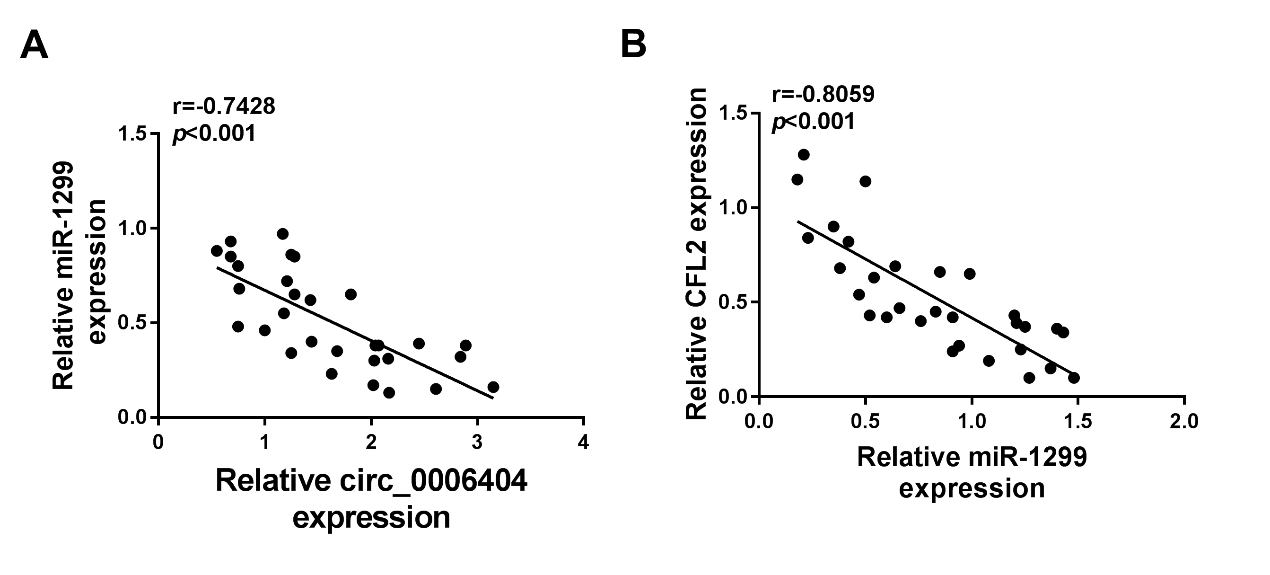


**Supplementary Figure 2. The linear correlation between the expression of miR-1299 and circ_0006404 or CFL2.** (A) The linear correlation between the expression of circ_0006404 and miR-1299 was analyzed by Spearman’s correlation coefficient. (B) Spearman’s correlation coefficient was utilized to assess the linear correlation between the expression of miR-1299 and CFL2.
